# Supplementary material for: In Women with Previous Pregnancy Hypertension, Levels of Cardiovascular Risk Biomarkers May Be Modulated by Haptoglobin Polymorphism
Source: Hindawi journal article supplement (doi:10.1155/2014/361727), 2014-01-01
Supplement: f1 [file 361727.f1.pdf]

**Supplementary table: Characterization of four distinguish groups in conformity of hypertension classification and the anthropometric, hemodynamic, cardiovascular risk biomarkers and other biochemical parameters in Hp 1.1 plus 2.1 phenotypes.**

|                                 | [PE > HTA] (1)      | [PE > NBP] (2)      | [NBPP > HTA] (3)   | [NBPP > NBP] (4)    | P value                     |                             |                             |                             |                             |                             |
|---------------------------------|---------------------|---------------------|--------------------|---------------------|-----------------------------|-----------------------------|-----------------------------|-----------------------------|-----------------------------|-----------------------------|
|                                 |                     |                     |                    |                     | 1.1 plus 2.1                |                             |                             |                             |                             |                             |
|                                 |                     |                     |                    |                     | (1)<br><i>Versus</i><br>(2) | (1)<br><i>Versus</i><br>(3) | (2)<br><i>Versus</i><br>(3) | (2)<br><i>Versus</i><br>(4) | (3)<br><i>Versus</i><br>(4) | (1)<br><i>Versus</i><br>(4) |
| <b>Age (years)</b>              | 25 (36.60 ± 4.56)   | 32 (33.66 ± 5.62)   | 6 (36.33 ± 4.97)   | 34 (35.50 ± 5.81)   | <b>0.038</b>                | 0.900                       | 0.284                       | 0.195                       | 0.743                       | 0.435                       |
| <b>BMI (Kg/m<sup>2</sup>) †</b> | 25 (26.97 ± 5.93)   | 31 (26.88 ± 5.23)   | 6 (28.71 ± 5.11)   | 34 (24.45 ± 3.22)   | 0.954                       | 0.514                       | 0.437                       | <b>0.026</b>                | <b>0.010</b>                | 0.063                       |
| <b>WC (cm) †</b>                | 25 (92.74 ± 22.68)  | 31 (88.94 ± 12.51)  | 6 (89.00 ± 15.11)  | 32 (81.20 ± 8.47)   | 0.429                       | 0.706                       | 0.991                       | <b>0.005</b>                | 0.078                       | <b>0.022</b>                |
| <b>Systolic BP (mmHg) †</b>     | 25 (147.56 ± 19.17) | 32 (124.56 ± 9.02)  | 6 (140.00 ± 6.23)  | 34 (115.50 ± 11.06) | < <b>0.001*</b>             | 0.353                       | < <b>0.001</b>              | <b>0.001</b>                | < <b>0.001</b>              | < <b>0.001</b>              |
| <b>Diastolic BP (mmHg) †</b>    | 25 (100.92 ± 18.48) | 32 (74.69 ± 10.26)  | 6 (86.00 ± 5.87)   | 34 (70.47 ± 10.26)  | < <b>0.001*</b>             | 0.063                       | <b>0.013</b>                | 0.100                       | <b>0.001</b>                | < <b>0.001</b>              |
| <b>Pulse pressure †</b>         | 25 (46.64 ± 15.13)  | 32 (49.88 ± 8.56)   | 6 (54.00 ± 9.53)   | 32 (45.03 ± 7.19)   | 0.312                       | 0.268                       | 0.294                       | <b>0.015</b>                | <b>0.011</b>                | 0.625                       |
| <b>CRP (mg/L) ††</b>            | 24 (0.45 ± 0.19)    | 30 (0.50 ± 0.09)    | 6 (0.70 ± 0.24)    | 32 (0.30 ± 0.17)    | 0.713                       | 0.112                       | 0.201                       | 0.217                       | <b>0.029</b>                | 0.488                       |
| <b>MPO (ng/mL) †</b>            | 3 (80.33 ± 6.42)    | 15 (96.93 ± 45.84)  | 3 (86.83 ± 24.08)  | 13 (54.38 ± 30.75)  | 0.550                       | 0.675                       | 0.720                       | <b>0.009</b>                | 0.112                       | <b>0.014</b>                |
| <b>Nitrites (µmol/L) †</b>      | 3 (30.40 ± 19.11)   | 15 (17.90 ± 2.89)   | 3 (9.00 ± 0.00)    | 14 (8.99 ± 2.32)    | 0.375                       | 0.192                       | < <b>0.001</b>              | < <b>0.001</b>              | 0.992                       | 0.191                       |
| <b>NOx (µmol/L) †</b>           | 3 (111.93 ± 62.36)  | 15 (99.04 ± 47.96)  | 3 (91.47 ± 63.00)  | 14 (78.19 ± 33.30)  | 0.692                       | 0.710                       | 0.816                       | 0.194                       | 0.597                       | 0.188                       |
| <b>AST (UI/L) †</b>             | 25 (19.16 ± 4.63)   | 32 (20.44 ± 5.52)   | 6 (17.17 ± 3.06)   | 34 (18.32 ± 4.72)   | 0.357                       | 0.327                       | 0.170                       | 0.099                       | 0.568                       | 0.500                       |
| <b>ALT (UI/L) ††</b>            | 25 (18.00 ± 1.23)   | 32 (18.00 ± 1.65)   | 6 (15.50 ± 1.01)   | 34 (15.00 ± 1.34)   | 0.729                       | 0.227                       | 0.185                       | <b>0.025</b>                | 0.761                       | 0.055                       |
| <b>t-Cholesterol (mg/dL) †</b>  | 25 (194.36 ± 41.45) | 32 (207.25 ± 36.41) | 6 (205.17 ± 14.09) | 34 (203.74 ± 36.14) | 0.217                       | 0.294                       | 0.892                       | 0.695                       | 0.925                       | 0.359                       |
| <b>Non HDL cholesterol †</b>    | 25 (147.96 ± 37.72) | 32 (156.56 ± 36.81) | 6 (154.17 ± 15.03) | 33 (155.97 ± 38.82) | 0.390                       | 0.698                       | 0.877                       | 0.950                       | 0.912                       | 0.434                       |
| <b>HDL (mg/dL) †</b>            | 25 (46.40 ± 8.46)   | 32 (50.69 ± 7.85)   | 6 (51.00 ± 8.67)   | 33 (48.27 ± 8.39)   | <b>0.053</b>                | 0.243                       | 0.930                       | 0.235                       | 0.470                       | 0.405                       |
| <b>LDL (mg/dL) †</b>            | 25 (129.73 ± 37.77) | 32 (134.14 ± 41.03) | 6 (133.87 ± 10.29) | 33 (138.87 ± 36.18) | 0.679                       | 0.794                       | 0.974                       | 0.630                       | 0.745                       | 0.358                       |
| <b>Apo A (mg/dL) †</b>          | 25 (0.96 ± 0.18)    | 31 (0.99 ± 0.14)    | 6 (0.94 ± 0.17)    | 34 (0.89 ± 0.17)    | 0.424                       | 0.841                       | 0.445                       | <b>0.011</b>                | 0.495                       | 0.142                       |
| <b>Apo B (mg/dL) †</b>          | 25 (0.60 ± 0.14)    | 32 (0.63 ± 0.14)    | 6 (0.69 ± 0.06)    | 34 (0.58 ± 0.13)    | 0.546                       | 0.870                       | 0.411                       | 0.126                       | 0.679                       | 0.422                       |

† Independent sample T – test; and values are means ± standard deviation (SD); †† Mann – Whitney U test; and values are median ± standard error (SE); Relatively to p value of (1) versus (2)\*, values were adjusted for age (regression binary logistic).

*Preeclamptic women (PE); hypertension after pregnancy (HTA); normal blood pressure in pregnancy (NBPP); normotensive after pregnancy (NBP); waist circumference (WC), Body mass index (BMI), systolic blood pressure (Systolic BP), diastolic blood pressure (Diastolic BP), c – reactive protein (CRP), myeloperoxidase (MPO), nitrites, total nitric oxide (NOx), aspartate transaminase (AST); alanine transaminase (ALT), low density lipoprotein (LDL) and high density lipoprotein (HDL), Apolipoprotein A and B (Apo A and Apo B).*
